# Supplementary material for: Impact of accelerated aging on seed quality, seed coat physical structure and antioxidant enzyme activity of Maize (Zea mays L.)
Source: PeerJ. 2024 Nov 11;12:e17988. doi: 10.7717/peerj.17988 (PMC11562826; doi:10.7717/peerj.17988)
Supplement: Supplemental Information 1 [file peerj-12-17988-s001.xlsx]

## Sheet: peroxidase
		Peroxidase	African Tall	R1	R2	Mean	SD	SE
.			C	15.6	16.7	16.15	0.777817	0.55
			T1	18.4	18.01	18.205	0.275772	0.195			16.15	12.3	10.32	12.9233
			T2	19.9	20.17	20.035	0.190919	0.135			18.2	14.17	11.67	14.68
											20.03	16	13.32	16.45
			MAH 14-5	R1	R2	Mean	SD	SE			18.1267	14.1567	11.77
			C	12.7	11.9	12.3	0.565685	0.4
			T1	14.4	13.95	14.175	0.318198	0.225
			T2	15.8	16.2	16	0.282843	0.2
			Local Red Landrace	R1	R2	Mean	SD	SE
			C	10.7	9.94	10.32	0.537401	0.38
			T1	11.8	11.54	11.67	0.183848	0.13
			T2	13.1	13.54	13.32	0.311127	0.22
		16.15	18.205	20.035
		12.3	14.175	16
		10.32	11.67	13.32
	Peroxidase (Mean)	African Tall	MAH 14-5	Local Landrace
	C	16.15	18.205	20.035
	T1	12.3	14.175	16
	T2	10.32	11.67	13.32
	Peroxidase (SE)	African Tall	MAH 14-5	Local Red Landrace		±
	C	0.55	0.4	0.38
	T1	0.195	0.225	0.13
	T2	0.135	0.2	0.22
	Peroxidase	Control	96h ageing	120h ageing
	African Tall	16.15± 0.55**	12.3± 0.19**	10.32± 0.13**
	MAH 14-5	18.205± 0.4**	14.175± 0.22**	11.67± 0.2**
	Local Red Landrace	20.035± 0.38**	16± 0.13**	13.32± 0.22**
	C	T1	T2		Anova: Two-Factor With Replication
W	15.6	18.4	19.9
	16.7	18.01	20.17		SUMMARY	T1	T2	Total
O	12.7	14.4	15.8		15.6
	11.9	13.95	16.2		Count	2	2	4
R	10.7	11.8	13.1		Sum	36.41	40.07	76.48
	9.94	11.54	13.54		Average	18.205	20.035	19.12
					Variance	0.07605	0.03645	1.1538
					12.7
					Count	2	2	4
					Sum	28.35	32	60.35
					Average	14.175	16	15.0875
					Variance	0.10125	0.08	1.17062
					10.7
					Count	2	2	4
					Sum	23.34	26.64	49.98
					Average	11.67	13.32	12.495
					Variance	0.0338	0.0968	0.951033
					Total
					Count	6	6
					Sum	88.1	98.71
					Average	14.6833	16.4517
					Variance	8.73851	9.1833
					ANOVA
					Source of Variation	SS	df	MS	F	P-value	F crit
					Sample	89.1637	2	44.5818	630.355	1.06273e-07	10.9248
					Columns	9.38101	1	9.38101	132.641	2.57519e-05	13.745
					Interaction	0.0210167	2	0.0105083	0.14858	0.865007	10.9248
					Within	0.42435	6	0.070725
					Total	98.99	11

## Sheet: ppo
	Polyphenol oxidase	African Tall	R1	R2	Mean	SD	SE
		C	0.05	0.07	0.06	0.0141421	0.01
		T1	0.07	0.06	0.065	0.00707107	0.005			0.06	0.06	0.06	0.06
		T2	0.07	0.05	0.06	0.0141421	0.01			0.16	0.16	0.17	0.163333
										0.18	0.19	0.18	0.183333
		MAH 14-5	R1	R2	Mean	SD	SE			0.133333	0.136667	0.136667
		C	0.17	0.16	0.165	0.00707107	0.005
		T1	0.15	0.17	0.16	0.0141421	0.01
		T2	0.18	0.16	0.17	0.0141421	0.01
		Local Red Landrace	R1	R2	Mean	SD	SE
		C	0.19	0.18	0.185	0.00707107	0.005
		T1	0.2	0.19	0.195	0.00707107	0.005
		T2	0.18	0.19	0.185	0.00707107	0.005
			Polyphenol oxidase mean	African Tall	MAH 14-5	Local Landrace
			C	0.06	0.165	0.185
			T1	0.065	0.16	0.195
			T2	0.06	0.17	0.185
			Polyphenol oxidase SEM	African Tall	MAH 14-5	Local Red Landrace
			C	0.01	0.005	0.005
			T1	0.005	0.01	0.005
			T2	0.01	0.01	0.005
			Polyphenol Oxidase	Control	96h ageing	120h ageing
			African Tall	0.06± 0.55	0.065± 0.005	0.06± 0.01
			MAH 14-5	0.165± 0.005	0.16± 0.01	0.17± 0.01
			Local Red Landrace	0.185± 0.04	0.195± 0.005	0.185± 0.07
		C	T1	T2		Anova: Two-Factor With Replication
	W	0.05	0.07	0.07
		0.07	0.06	0.05		SUMMARY	T1	T2	Total
	O	0.17	0.15	0.18		0.05
		0.16	0.17	0.16		Count	2	2	4
	R	0.19	0.2	0.18		Sum	0.13	0.12	0.25
		0.18	0.19	0.19		Average	0.065	0.06	0.0625
						Variance	5e-05	0.0002	9.16667e-05
						0.17
						Count	2	2	4
						Sum	0.32	0.34	0.66
			Genotype	Ageing	G * A	Average	0.16	0.17	0.165
		SE(d)	0	1.03594	0.634382	Variance	0.0002	0.0002	0.000166667
		CD (0.01)	0	#NUM!	#NUM!
		SEM	0	0.732522	0.448576	0.19
						Count	2	2	4
						Sum	0.39	0.37	0.76
						Average	0.195	0.185	0.19
						Variance	5e-05	5e-05	6.66667e-05
	FACTOR A	3
	FACTOR B	3				Total
	CONTROL	0				Count	6	6
	REPLICATIONS	2				Sum	0.84	0.83
	treatments	3				Average	0.14	0.138333
	total observations	6				Variance	0.00368	0.00381667
						ANOVA
						Source of Variation	SS	df	MS	F	P-value	F crit
						Sample	0.0365167	2	0.0182583	146.067	8.15121e-06	10.9248
						Columns	8.33333e-06	1	8.33333e-06	0.0666667	0.804882	13.745
						Interaction	0.000216667	2	0.000108333	0.866667	0.467039	10.9248
						Within	0.00075	6	0.000125
						Total	0.0374917	11

## Sheet: catalase
		Catalase	African Tall	R1	R2	Mean	SD	SE
			C	15.6	16.7	16.15	0.777817	0.55
			T1	13.4	12.01	12.705	0.982878	0.695
			T2	10.7	11.97	11.335	0.898026	0.635
			MAH 14-5	R1	R2	Mean	SD	SE
			C	17.7	18.9	18.3	0.848528	0.6
			T1	16	16.95	16.475	0.671751	0.475
			T2	15.5	16	15.75	0.353553	0.25
			Local Red Landrace	R1	R2	Mean	SD	SE
			C	19.5	20.4	19.95	0.636396	0.45
			T1	17.8	19.54	18.67	1.23037	0.87
			T2	16.91	19.54	18.225	1.85969	1.315
		Catalase	African Tall	MAH 14-5	Local Landrace
		C	16.15	18.3	19.95
		T1	12.705	16.475	18.67
		T2	11.335	15.75	18.225
		Catalase	African Tall	MAH 14-5	Local Red Landrace
		C	0.55	0.6	0.45
		T1	0.695	0.775	0.63			16.15	12.7	11.33	13.3933
		T2	0.135	0.85	0.72			18.3	16.47	15.75	16.84
								19.95	18.67	18.22	18.9467
		Catalase	Control	96h ageing	120h ageing			18.1333	15.9467	15.1
		African Tall	16.15± 0.55	12.705± 0.695	11.335± 0.135
		MAH 14-5	18.3± 0.6	16.47± 0.775	15.75± 0.85
		Local Red Landrace	19.95± 0.45	18.67± 0.63	18.225± 0.72
		C	T1	T2		Anova: Two-Factor With Replication
	African Tall	15.6	13.4	10.7
		16.7	12.01	11.97		SUMMARY	T1	T2	Total
		15.6	13.4	10.7		15.6
		16.7	12.01	11.97		Count	4	4	8
	MAH 14-5	17.7	16	15.5		Sum	50.82	45.34	96.16
		18.9	16.95	16		Average	12.705	11.335	12.02
		17.7	16	15.5		Variance	0.644033	0.537633	1.04269
		18.9	16.95	16
	Local Red Landrace	19.5	17.8	16.91		17.7
		20.4	19.54	19.54		Count	4	4	8
		19.5	17.8	16.91		Sum	65.9	63	128.9
		20.4	19.54	19.54		Average	16.475	15.75	16.1125
						Variance	0.300833	0.0833333	0.314821
						19.5
						Count	4	4	8
						Sum	74.68	72.9	147.58
						Average	18.67	18.225	18.4475
						Variance	1.0092	2.30563	1.47722
						Total
						Count	12	12
						Sum	191.4	181.24
						Average	15.95	15.1033
						Variance	7.15258	9.65755
						ANOVA
						Source of Variation	SS	df	MS	F	P-value	F crit
						Sample	169.369	2	84.6847	104.106	1.27879e-10	6.0129
						Columns	4.30107	1	4.30107	5.28747	0.0336655	8.28542
						Interaction	0.900033	2	0.450017	0.553224	0.584565	6.0129
						Within	14.642	18	0.813444
						Total	189.213	23

## Sheet: SOD
		SOD	African Tall	R1	R2	Mean	SD	SE
			C	18.6	19.7	19.15	0.777817	0.55
			T1	16.4	17.01	16.705	0.431335	0.305
			T2	15.9	14.17	15.035	1.22329	0.865
			MAH 14-5	R1	R2	Mean	SD	SE
			C	20.7	19.9	20.3	0.565685	0.4
			T1	18.4	17.95	18.175	0.318198	0.225
			T2	17.8	16.2	17	1.13137	0.8
			Local Red Landrace	R1	R2	Mean	SD	SE
			C	22.7	23.94	23.32	0.876812	0.62
			T1	20.8	21.04	20.92	0.169706	0.12
			T2	20.1	19.54	19.82	0.39598	0.28
19.15	16.7	15.03	16.96		SOD mean	African Tall	MAH 14-5	Local Landrace
20.3	18.17	17	18.49		Control	19.15	20.3	23.32
23.32	20.92	19.82	21.3533		T1 (96h of ageing)	16.705	18.175	20.92
20.9233	18.5967	17.2833			T2 (120h of ageing)	15.035	17	19.82
					SOD SEM	African Tall	MAH 14-5	Local Red Landrace
					C	0.55	0.4	0.62
					T1	0.305	0.225	0.12
					T2	0.865	0.8	0.28
				Superoxide Dismutase	Control	96h ageing	120h ageing
				African Tall	19.15± 0.55	16.705± 0.305	15.035± 0.865
				MAH 14-5	20.3± 0.4	18.175± 0.225	17± 0.8
				Local Red Landrace	23.32± 0.62	20.92± 0.12	19.82± 0.28
			c	t1	t2	Anova: Two-Factor With Replication
		W	18.6	16.4	15.9
			19.7	17.01	14.17	SUMMARY	t1	t2	Total
		O	20.7	18.4	17.8	18.6
			19.9	17.95	16.2	Count	2	2	4
		R	22.7	20.8	20.1	Sum	33.41	30.07	63.48
			23.94	21.04	19.54	Average	16.705	15.035	15.87
						Variance	0.18605	1.49645	1.49047
						20.7
						Count	2	2	4
						Sum	36.35	34	70.35
						Average	18.175	17	17.5875
						Variance	0.10125	1.28	0.920625
						22.7
						Count	2	2	4
						Sum	41.84	39.64	81.48
						Average	20.92	19.82	20.37
						Variance	0.0288	0.1568	0.4652
						Total
						Count	6	6
						Sum	111.6	103.71
						Average	18.6	17.285
						Variance	3.72484	5.21463
						ANOVA
						Source of Variation	SS	df	MS	F	P-value	F crit
						Sample	41.2561	2	20.6281	38.0902	0.000389178	10.9248
						Columns	5.18767	1	5.18767	9.57916	0.0212511	13.745
						Interaction	0.19185	2	0.095925	0.177128	0.841899	10.9248
						Within	3.24935	6	0.541558
						Total	49.885	11
