# Supplementary material for: Impact of accelerated aging on seed quality, seed coat physical structure and antioxidant enzyme activity of Maize (Zea mays L.)
Source: PeerJ. 2024 Nov 11;12:e17988. doi: 10.7717/peerj.17988 (PMC11562826; doi:10.7717/peerj.17988)
Supplement: Supplemental Information 2 [file peerj-12-17988-s002.xlsx]

## Sheet: Maize
		Maize (Fig. 9,10,11)
			Germination	Catalase
		African tall (c)	100	16.15
		T1	94	12.7
		T2	90	11.33
			Germination	Catalase
		MAH 14-5 (c)	100	18.3
		T1	96	16.47
		T2	92	15.75
			Germination	Catalase
		Local landrace (c)	100	19.95
		T1	99	18.67
		T2	96	18.22
			Germination	Superoxide dismutase
		African tall (c)	100	19.15
		T1	94	16.7
		T2	90	15.03
			Germination	Superoxide dismutase
		MAH 14-5 (c)	100	20.3
		T1	96	18.17
		T2	92	17
			Germination	Superoxide dismutase
		Local landrace (c)	100	23.32
		T1	99	20.92
		T2	96	19.82
			Germination	Peroxidase
		African tall (c)	100	16.15
		T1	94	12.3
		T2	90	10.32
			Germination	Peroxidase
		MAH 14-5 (c)	100	18.2
		T1	96	14.17
		T2	92	11.67
			Germination	Peroxidase
		Local landrace (c)	100	20.03
		T1	99	16
		T2	96	11.77
			EC	Phenol
		African tall	11.04	1.184
		MAH 14-5	6.93	6.693
		Local landrace	5.94	9.801
			POP	Phenol
		African tall	0.06	1.184
		MAH 14-5	0.16	6.693
		Local landrace	0.18	9.801
