# Supplementary material for: Impact of accelerated aging on seed quality, seed coat physical structure and antioxidant enzyme activity of Maize (Zea mays L.)
Source: PeerJ. 2024 Nov 11;12:e17988. doi: 10.7717/peerj.17988 (PMC11562826; doi:10.7717/peerj.17988)
Supplement: Supplemental Information 3 [file peerj-12-17988-s003.xlsx]

## Sheet: Sheet1
		Genotype	Seed germination			Viability			Electrical conductivity
			(per cent)			(per cent)			(µScm-1g-1)
			Control	Ageing	Ageing	Control	Ageing	Ageing	Control	Ageing	Ageing
				(96 h)	(120 h)		(96 h)	(120 h)		(96 h)	(120 h)
		African tall	100± 0.00**	94± 1.15**	90± 0.75**	100±0.00	100±0.00.	100±0.00	11.045±0.76**	12.705±0.42**	15.09±0.55**
		MAH 14-5	100± 0.00**	96± 0.5**	92± 0.5**	100±0.00	100±0.00	100±0.00	6.935±0.72**	8.975±0.34**	9.655±0.44**
		Local landrace	100± 0.00**	99±0.81**	96±0.5**	100±0.00	100±0.00	100±0.00	5.945±0.51**	7.675±0.41**	8.82±0.22**
	Seed germination					Seed germination					Seed germination
	(per cent)					(per cent)					(per cent)
White	Control	Ageing	Ageing		Orange	Control	Ageing	Ageing		Red	Control	Ageing	Ageing
		(96 h)	(120 h)				(96 h)	(120 h)				(96 h)	(120 h)
R1	100	95	91		R1	100	96	93		R1	100	98	97
R2	100	93	90		R2	100	97	92		R2	100	99	96
R3	100	93	91		R3	100	96	92		R3	100	100	97
R4	100	95	91		R4	100	96	92		R4	100	99	97
Mean	100	94	90.75		Mean	100	96.25	92.25		Mean	100	99	96.75
SD	0	1.1547	0.5		SD	0	0.5	0.5		SD	0	0.816497	0.5
SEM	0	0.57735	0.25		SEM	0	0.25	0.25		SEM	0	0.408248	0.25
cv	0	1.2284	0.550964		CV	0	0.519481	0.542005		CV	0	0.824744	0.516796
		EC					EC					EC
	White	Control	Ageing	Ageing		Orange	Control	Ageing	Ageing		Red	Control	Ageing	Ageing
			(96 h)	(120 h)				(96 h)	(120 h)				(96 h)	(120 h)
	R1	10.21	12.1	14.63		R1	7.92	9.13	9.75		R1	6.17	7.44	8.99
	R2	11.7	12.97	15.08		R2	7.01	9.32	10.01		R2	5.98	8.13	8.75
	R3	10.58	12.74	15.87		R3	6.55	8.51	9.01		R3	5.22	7.91	9.01
	R4	11.69	13.01	14.78		R4	6.26	8.94	9.85		R4	6.41	7.22	8.53
	Mean	11.045	12.705	15.09		Mean	6.935	8.975	9.655		Mean	5.945	7.675	8.82
	SD	0.765615	0.420516	0.55263		SD	0.725649	0.346651	0.443133		SD	0.51436	0.418131	0.226569
	SEM	0.382808	0.210258	0.276315		SEM	0.362825	0.173325	0.221566		SEM	0.25718	0.209065	0.113284
										Anova: Two-Factor With Replication
						Control	96 h	120 h
					White	100	95	91		SUMMARY	Control	96 h	120 h	Total
						100	93	90		White
						100	93	91		Count	4	4	4	12
						100	95	91		Sum	400	376	363	1139
					Orange	100	96	93		Average	100	94	90.75	94.9167
						100	97	92		Variance	0	1.33333	0.25	16.447
						100	96	92
						100	96	92		Orange
					Red	100	98	97		Count	4	4	4	12
						100	99	96		Sum	400	385	369	1154
						100	100	97		Average	100	96.25	92.25	96.1667
						100	99	97		Variance	0	0.25	0.25	11.0606
										Red
	EC									Count	4	4	4	12
		R1	R2	R3	R4	Mean	SD	SEM		Sum	400	396	387	1183
	C	10.21	11.7	10.58	11.69	11.045	0.765615	0.382808		Average	100	99	96.75	98.5833
W	96	12.1	12.97	12.74	13.01	12.705	0.420516	0.210258		Variance	0	0.666667	0.25	2.26515
	120	14.63	15.08	15.87	14.78	15.09	0.55263	0.276315
	C	7.92	7.01	6.55	6.26	6.935	0.725649	0.362825		Total
O	96	9.13	9.32	8.51	8.94	8.975	0.346651	0.173325		Count	12	12	12
	120	9.75	10.01	9.01	9.85	9.655	0.443133	0.221566		Sum	1200	1157	1119
	C	6.17	5.98	5.22	6.41	5.945	0.51436	0.25718		Average	100	96.4167	93.25
R	96	7.44	8.13	7.91	7.22	7.675	0.418131	0.209065		Variance	0	5.17424	7.29545
	120	8.99	8.75	9.01	8.53	8.82	0.226569	0.113284
										ANOVA
		11.04	12.7	15.09	12.9433					Source of Variation	SS	df	MS	F	P-value	F crit
		6.93	8.97	9.65	8.51667					Sample	83.3889	2	41.6944	125.083	2.22028e-14	5.48812
		5.94	7.67	8.82	7.47667					Columns	273.722	2	136.861	410.583	6.15056e-21	5.48812
		7.97	9.78	11.1867						Interaction	44.7778	4	11.1944	33.5833	4.04522e-10	4.10562
										Within	9	27	0.333333
										Total	410.889	35
			FACTOR A	3
			FACTOR B	3						Genotype	Ageing	G * A
			CONTROL	0					SE(d)	0.942809	0.942809	0.204124
			REPLICATIONS	4					CD (0.01)	2.78744	2.78744	4.03214
			treatments	3					SEM	0.666667	0.666667	0.144338
			total observations	12
	EC		C	96	120		Anova: Two-Factor With Replication
		White	10.21	12.1	14.63
			11.7	12.97	15.08		SUMMARY	96	120	Total
			10.58	12.74	15.87		10.21
			11.69	13.01	14.78		Count	4	4	8
		Orange	7.92	9.13	9.75		Sum	50.82	60.36	111.18
			7.01	9.32	10.01		Average	12.705	15.09	13.8975
			6.55	8.51	9.01		Variance	0.176833	0.3054	1.83188
			6.26	8.94	9.85
		Red	6.17	7.44	8.99		7.92
			5.98	8.13	8.75		Count	4	4	8
			5.22	7.91	9.01		Sum	35.9	38.62	74.52
			6.41	7.22	8.53		Average	8.975	9.655	9.315
							Variance	0.120167	0.196367	0.267771
							6.17
							Count	4	4	8
							Sum	30.7	35.28	65.98
							Average	7.675	8.82	8.2475
							Variance	0.174833	0.0513333	0.471507
		FACTOR A	3
		FACTOR B	3				Total
		CONTROL	0				Count	12	12
		REPLICATIONS	4				Sum	117.42	134.26
		treatments	3				Average	9.785	11.1883
		total observations	12				Variance	5.08672	8.58107
							ANOVA
			Genotype	Ageing	G * A		Source of Variation	SS	df	MS	F	P-value	F crit
		SE(d)	0.674927	0.674927	0.146126		Sample	144.164	2	72.0818	421.97	7.55372e-16	6.0129
		CD (0.01)	3.05454	3.05454	9.92484		Columns	11.8161	1	11.8161	69.1717	1.40306e-07	8.28542
		SEM	0.477245	0.477245	0.103327		Interaction	3.10723	2	1.55362	9.09493	0.00186282	6.0129
							Within	3.0748	18	0.170822
							Total	162.162	23

## Sheet: Sheet2
						Control	Ageing	Ageing
							(96 h)	(120 h)
					R1	100	95	91					R1	R2	R3	R4
					R2	100	93	90		White	Control		100	100	100	100
					R3	100	93	91			Ageing	(96 h)	95	93	93	95
					R4	100	95	91			Ageing	(120 h)	91	90	91	91
					R1	100	96	93
					R2	100	97	92		O			100	100	100	100
					R3	100	96	92					96	97	96	96
					R4	100	96	92					93	92	92	92
					R1	100	98	97
					R2	100	99	96		R			100	100	100	100
					R3	100	100	97					98	99	100	99
					R4	100	99	97					97	96	97	97
