# Supplementary material for: Impact of accelerated aging on seed quality, seed coat physical structure and antioxidant enzyme activity of Maize (Zea mays L.)
Source: PeerJ. 2024 Nov 11;12:e17988. doi: 10.7717/peerj.17988 (PMC11562826; doi:10.7717/peerj.17988)
Supplement: Supplemental Information 4 [file peerj-12-17988-s004.xlsx]

## Sheet: SV1
	Genotype	Seed germination
		(per cent)
		Control	Ageing	Ageing
			(96 h)	(120 h)
	African tall	100± 0.00**	94± 1.15**	90± 0.75**
	MAH 14-5	100± 0.00**	96± 0.5**	92± 0.5**
	Local landrace	100± 0.00**	99±0.81**	96±0.5**
	SV 1	Germination %	Seedling length (cm)	SV1
	W- C	100	30.1	3010				R1	R2	R3	R4	Mean	SD	SEM
	96h	94	27.64	2598.16			C	3010	2998	3145	3001	3038.5	71.1829	35.5914
	120h	90	22.21	1998.9		W	96	2598.16	2489	2478	2354	2479.79	99.8709	49.9355
	O -C	100	31.52	3152			120	1998.9	1917	1897	1907	1929.97	46.6698	23.3349
	96h	96	27.12	2603.52			C	3152	3189	3358	3174	3218.25	94.3977	47.1988
	120h	92	22.42	2062.64		O	96	2603.52	2748	2509	2667	2631.88	101.03	50.5149
	R-C	100	33.74	3374			120	2262.64	2398	2214	2017	2222.91	157.811	78.9057
	96h	99	29.59	2929.41			C	3374	3498	3310	3489	3417.75	91.3615	45.6807
	120h	96	28.75	2760		R	96	2929.41	2874	3001	2978	2945.6	56.2956	28.1478
							120	2760	2654	2844	2799	2764.25	81.1187	40.5594
			C	96	120		Anova: Two-Factor With Replication
		W	3010	2598.16	1998.9
			2998	2489	1917		SUMMARY	96	120	Total
			3145	2478	1897		3010
			3001	2354	1907		Count	4	4	8
		O	3152	2603.52	2262.64		Sum	9919.16	7719.9	17639.1
			3189	2748	2398		Average	2479.79	1929.97	2204.88
			3358	2509	2214		Variance	9974.2	2178.07	91578.6
			3174	2667	2017
		R	3374	2929.41	2760		3152
			3498	2874	2654		Count	4	4	8
			3310	3001	2844		Sum	10527.5	8891.64	19419.2
			3489	2978	2799		Average	2631.88	2222.91	2427.39
							Variance	10207	24904.4	62835.3
							3374
							Count	4	4	8
							Sum	11782.4	11057	22839.4
							Average	2945.6	2764.25	2854.93
							Variance	3169.2	6580.25	13575.1
			Genotype	Ageing	G * A		Total
		SE(d)	159.183	159.183	34.4641		Count	12	12
		CD (0.01)	2.57755	2.57755	2.58378		Sum	32229.1	27668.5
		SEM	112.559	112.559	24.3698		Average	2685.76	2305.71
							Variance	47402.8	139469
							ANOVA
	FACTOR A	3					Source of Variation	SS	df	MS	F	P-value	F crit
	FACTOR B	3					Sample	1.74627e+06	2	873136	91.8878	3.57796e-10	6.0129
	CONTROL	0					Columns	866609	1	866609	91.2009	1.80555e-08	8.28542
	REPLICATIONS	4					Interaction	138274	2	69137.2	7.27592	0.00483362	6.0129
	treatments	3					Within	171040	18	9502.2
	total observations	12
							Total	2.92219e+06	23

## Sheet: SV2
	SV 1	Germination %	Dry weight	SV2					white	black
	W- C	100	0.715	71.5				48h R1	0.188	0.28
	96h	94	0.597	56.118				R2	0.183	0.236
	120h	90	0.471	42.39				Mean	0.1855	0.258
	O -C	100	0.721	72.1				72h R1	0.082	0.307
	96h	96	0.696	66.816				R2	0.101	0.287
	120h	92	0.547	50.324				Mean	0.0915	0.297
	R-C	100	0.724	72.4
	96h	99	0.712	70.488
	120h	96	0.684	65.664
				Seedling vigor index-I	Seedling vigor index-II
			African tall
			Control	3110± 1.2**	71.5± 0.58**				R1	R2	R3	R4	Mean	SD	SEM
			96h of ageing	2598.16± 1.75**	56.118± 0.79**			C	71.5	72.1	70.5	71.9	71.5	0.711805	0.355903
			120h of ageing	1998.9± 0.78**	42.39± 1.14**		W	96	56.118	55.89	54.12	55.09	55.3045	0.904368	0.452184
			MAH 14-5					120	42.39	44.7	43.1	42.7	43.2225	1.02698	0.513491
			Control	3152± 0.95**	72.1± 0.89**			C	72.1	71.8	70.1	72.8	71.7	1.14601	0.573004
			96h of ageing	2603.52± 1.15**	66.816± 0.41**		O	96	66.816	67.09	67.4	65.9	66.8015	0.646619	0.323309
			120h of ageing	2062.64± 1.7**	50.324± 0.14**			120	50.324	54.89	48.52	49.21	50.736	2.86733	1.43367
			Local red landrace					C	72.4	71.8	73.25	72.7	72.5375	0.604669	0.302335
			Control	3194± 0.54**	72.4± 0.74**		R	96	70.488	71	69.12	69.01	69.9045	0.992667	0.496333
			96h of ageing	2929.41± 0.78**	70.488± 0.48**			120	65.664	64.2	65.79	66.74	65.5985	1.04877	0.524387
			120h of ageing	2760± 1.25**	65.664± 0.59**
				C	96	120			Anova: Two-Factor With Replication
			W	71.5	56.118	42.39
				72.1	55.89	44.7			SUMMARY	96	120	Total
				70.5	54.12	43.1			71.5
				71.9	55.09	42.7			Count	4	4	8
			O	72.1	66.816	50.324			Sum	221.218	172.89	394.108
				71.8	67.09	54.89			Average	55.3045	43.2225	49.2635
				70.1	67.4	48.52			Variance	0.817881	1.05469	42.5096
				72.8	65.9	49.21
			R	72.4	70.488	65.664			72.1
				71.8	71	64.2			Count	4	4	8
				73.25	69.12	65.79			Sum	267.206	202.944	470.15
				72.7	69.01	66.74			Average	66.8015	50.736	58.7687
									Variance	0.418116	8.2216	77.4457
				Genotype	Ageing	G * A
			SE(d)	2.36621	2.36621	0.512299			72.4
			CD (0.01)	2.69807	2.69807	3.24984			Count	4	4	8
			SEM	1.67316	1.67316	0.36225			Sum	279.618	262.394	542.012
									Average	69.9045	65.5985	67.7515
									Variance	0.985388	1.09993	6.19132
									Total
		FACTOR A	3						Count	12	12
		FACTOR B	3						Sum	768.042	638.228
		CONTROL	0						Average	64.0035	53.1857
		REPLICATIONS	4						Variance	43.6325	97.1368
		treatments	3
		total observations	12
									ANOVA
									Source of Variation	SS	df	MS	F	P-value	F crit
									Sample	1367.59	2	683.794	325.678	7.35419e-15	6.0129
									Columns	702.153	1	702.153	334.422	4.49138e-13	8.28542
									Interaction	143.08	2	71.5401	34.0732	7.59134e-07	6.0129
									Within	37.7928	18	2.0996
									Total	2250.61	23

## Sheet: moisture
			Seed Moisture Content (%)
		Genotypes	Control	Ageing (96h)	Ageing (120h)	Mean
		African Tall	10	16	17	14.3333
		MAH 14-5	10	14	15	13
		Local landrace	10	11	12	11
		Mean	10	13.6667	14.6667
		SD	0	2.51661	2.51661
		CV	0	18.4142	17.1587
			Genotype (G)	Ageing (A)	GXA
		SEm±	0.14	0.11	0.2
		CD (0.01)	0.56	0.46	0.79
