# Supplementary material for: Impact of accelerated aging on seed quality, seed coat physical structure and antioxidant enzyme activity of Maize (Zea mays L.)
Source: PeerJ. 2024 Nov 11;12:e17988. doi: 10.7717/peerj.17988 (PMC11562826; doi:10.7717/peerj.17988)
Supplement: Supplemental Information 5 [file peerj-12-17988-s005.xlsx]

## Sheet: TDH
		Control	African tall	MAH 14-5	Local landrace	T1	African tall	MAH 14-5	Local landrace	T2	African tall	MAH 14-5	Local landrace
		R1	0.25	0.608	0.853	R1	0.111	0.435	0.608	R1	0.059	0.22	0.595
		R2	0.274	0.685	0.798	R2	0.189	0.407	0.597	R2	0.097	0.289	0.514
		Mean	0.262	0.6465	0.8255	mean	0.15	0.421	0.6025	mean	0.078	0.2545	0.5545
		SD	0.0169706	0.0544472	0.0388909	SD	0.0551543	0.019799	0.00777817	SD	0.0268701	0.0487904	0.0572756	Mean	African tall	MAH 14-5	Local landrace	SEM	African tall	MAH 14-5	Local red landrace
		SEM	0.012	0.0385	0.0275	SEM	0.039	0.014	0.0055	SEM	0.019	0.0345	0.0405	Control	0.262	0.6465	0.8255	C	0.012	0.0385	0.0275
														T1 (96h ageing)	0.15	0.421	0.6025	T1	0.039	0.014	0.0055
														T2 (120h ageing)	0.078	0.2545	0.5545	T2	0.019	0.0345	0.0405
																								Genotype	Total Dehydrogenase (OD @ 480nm)
																									Control	Ageing	Ageing
																										(96 h)	(120 h)
																								African tall	0.262±0.012**	0.15±0.039**	0.078±0.019**
																								MAH 14-5	0.6465±0.0385**	0.421±0.014**	0.2545±0.0345**
																								Local red landrace	0.8255±0.0275**	0.6025±0.0055**	0.5545±0.0405**
																		R1	R2	R3	R4	Mean	SD	SEM
																	C	0.262	0.29	0.27	0.274	0.274	0.0117757	0.00588784
																W	96	0.15	0.169	0.148	0.155	0.1555	0.00946925	0.00473462
																	120	0.078	0.089	0.077	0.098	0.0855	0.00994987	0.00497494
																	C	0.6465	0.67	0.66	0.65	0.656625	0.0105938	0.00529691
																O	96	0.421	0.47	0.44	0.437	0.442	0.020445	0.0102225
																	120	0.2545	0.24	0.27	0.254	0.254625	0.0122568	0.0061284
																	C	0.8255	0.874	0.814	0.798	0.827875	0.0327525	0.0163763
																R	96	0.6025	0.661	0.648	0.598	0.627375	0.0318208	0.0159104
																	120	0.5545	0.578	0.51	0.544	0.546625	0.0282529	0.0141265
																			C	96	120
																		W	0.274	0.1555	0.0855	0.171667
																		O	0.656625	0.442	0.254625	0.451083
																		R	0.827875	0.627375	0.546625	0.667292
																			0.586167	0.408292	0.295583
																		C	96	120		Anova: Two-Factor With Replication
																	White	0.262	0.15	0.078
																		0.29	0.169	0.089		SUMMARY	96	120	Total
																		0.27	0.148	0.077		0.262
																		0.274	0.155	0.098		Count	4	4	8
																	Orange	0.6465	0.421	0.2545		Sum	0.622	0.342	0.964
																		0.67	0.47	0.24		Average	0.1555	0.0855	0.1205
																		0.66	0.44	0.27		Variance	8.96667e-05	9.9e-05	0.00148086
																		0.65	0.437	0.254
																	Red	0.8255	0.6025	0.5545		0.6465
																		0.874	0.661	0.578		Count	4	4	8
																		0.814	0.648	0.51		Sum	1.768	1.0185	2.7865
																		0.798	0.598	0.544		Average	0.442	0.254625	0.348312
																						Variance	0.000418	0.000150229	0.0102748
																						0.8255
																						Count	4	4	8
																						Sum	2.5095	2.1865	4.696
																						Average	0.627375	0.546625	0.587
																						Variance	0.00101256	0.000798229	0.00263907
																	FACTOR A	3				Total
																	FACTOR B	3				Count	12	12
																	CONTROL	0				Sum	4.8995	3.547
																	REPLICATIONS	4				Average	0.408292	0.295583
																	treatments	3				Variance	0.0415191	0.0398619
																	total observations	12
												2.87844										ANOVA
																						Source of Variation	SS	df	MS	F	P-value	F crit
																		Genotype	Ageing	G * A		Sample	0.870647	2	0.435323	1017.23	3.06876e-19	6.0129
																	SE(d)	0.0337816	0.0337816	0.00731392		Columns	0.076219	1	0.076219	178.103	8.95563e-11	8.28542
																	CD (0.01)	#NUM!	#NUM!	#NUM!		Interaction	0.0168409	2	0.00842045	19.6763	2.9544e-05	6.0129
																	SEM	0.0238872	0.0238872	0.00517173		Within	0.00770306	18	0.000427948
																	CD (0.01)	0.08	0.08	0.02
																						Total	0.97141	23
